# Supplementary material for: Hydroxylation boosted low-overpotential CO2 reduction to ethylene for a Cu/PTFE electrode
Source: Royal Society of Chemistry journal article supplement (doi:10.1039/d4cc03845b), 2024-01-01
Supplement: d4cc03845b1.pdf [file d4cc03845b1.pdf]

*Electronic Supplementary Material (ESI) for ChemComm.*

*This journal is © The Royal Society of Chemistry 2023*

### Supporting information

## Hydroxylation boosted low-overpotential CO<sub>2</sub> reduction to ethylene for Cu/PTFE electrode

Yifeng Wang<sup>a,b</sup>, Haoliang Huang<sup>a,c</sup>, Shengjie Zhang<sup>a</sup>, Hao Zhang<sup>a</sup>, Chao Jing<sup>\*a,b</sup>, Jian-Qiang Wang<sup>\*a,b</sup>, Linjuan Zhang<sup>\*a,b</sup>

<sup>a</sup>Key Laboratory of Interfacial Physics and Technology, Shanghai Institute of Applied Physics, Chinese Academy of Sciences, Shanghai 201800, P.R. China.

<sup>b</sup>University of Chinese Academy of Sciences, Beijing 100049, P.R. China.

<sup>c</sup>Songshan Lake Materials Laboratory, Dongguan 523808, P. R. China.

## Materials

Carbon dioxide (CO<sub>2</sub>, 99.999%) and Argon (Ar, 99.999%) were from Xiangkun Specialty Gases Co., Ltd. (Shanghai, China). Milli-Q water (18.2 MΩ cm) produced using the Milli-Q apparatus from Millipore (USA). Cu nanoparticles (Cu NPs, 10-30 nm particle size) was purchased from Macklin. Cu target (99.999%) was from Fuzhou Innovation Photoelectric Technology Co., Ltd. Carbon paper (GDL, YLS-30T) and Nafion solution (5 wt %) were from Sinero. Anion-exchange membrane (FAA-3-PK-130) was from shanghai chuxi industrial co. ltd. Polylactide (PLA) was from Cagle Technology Co., Ltd. Polytetrafluoroethylene (PTFE) membrane was from Beijing Zhongxingweiye Instrument Co., Ltd.

## Electrode preparation

Cu-sputtered PTFE was prepared via ion sputtering on a sputter coater (108 Manual) at a current of 30 mA under vacuum at 0.06 mbar for 9 mins totally. M\_Cu and D\_Cu were sputtered in moist and dry argon atmosphere, respectively. M\_Cu and D\_Cu were directly used as electrode.

An ink containing a mixture of Nafion, isopropanol and Cu NPs was airbrushed (using N<sub>2</sub> gas as a carrier gas) on a carbon paper serving as substrate. After drying under vacuum, a round electrode with a diameter of about 1.6 cm was cut and assembled into a flow cell.

## Characterization

The Cu-sputtered PTFE electrodes were characterized using SEM on a Zeiss Crossbeam 540 apparatus and TEM on a JEM 2100F FEI Tecnai F20 apparatus. X-ray diffraction (XRD) was measured on a D8 Advance X-ray diffractometer equipped with graphite-monochromatized Cu K $\alpha$  radiation. The oxidation state of Cu in the samples were studied by X-ray photoelectron spectroscopy (XPS) (ESCALAB Xi+). Fourier-transform infrared spectroscopy (ATR-FTIR) experiments were conducted on a Vertex 80 FTIR spectrometer with CaF<sub>2</sub> as the prismatic window at room temperature. Static contact angle is measured on a SDC 350KS contact angle meter. The binding energy data were calibrated with reference to the C 1s signal at 284.8 eV. Raman spectral data were collected by using a confocal microscope (Horiba, LabRAM HR Evolution). The source of the excitation was a 473 nm laser beam. Calibration of spectra was carried out using a silicon wafer with a standard peak at 520.7 cm<sup>-1</sup>. A three-electrode setup was used in the in situ Raman spectroscopy measurements in CO<sub>2</sub>-saturated 0.5 M KHCO<sub>3</sub>, including a working electrode of Au, a counter electrode made of platinum wire, and a Ag/AgCl reference electrode.

## Electrochemical Measurements

Electrochemical measurements were performed in a flow cell configuration consisting of a gas diffusion layer, an anion exchange membrane and a nickel mesh anode, connected to a PGSTAT302N potentiostat (Metrohm Autolab, equipped with BA and FRA32M modules). The geometric active surface area of both anode and cathode are 1 cm<sup>2</sup>. An Ag/AgCl electrode (with 3 M KCl as the filling solution) was used as the reference electrode. All the applied cathode potentials in the flow cell were converted to the reversible hydrogen electrode (RHE) reference scale with a standard compensation by:

$$E(V \text{ vs. RHE}) = E(V \text{ vs. Ag/AgCl}) + 0.197 + 0.059 \times pH - 90\% \times i \times R$$

Where R is the solution resistance, which was determined to be ca. 5  $\omega$  as shown in Fig. S10. A factor of 90% was applied for iR compensation during flow cell operation.

The gas products from CO<sub>2</sub>RR were analyzed using a gas chromatograph (GC-2060) coupled with a thermal conductivity detector (TCD) and a flame ionization detector (FID).

### Density functional theory calculation

In this work, the calculations were performed applying density functional theory (DFT) with the Perdew, Burke, and Ernzerhof generalized gradient functional (GGA-PBE)<sup>1</sup> using the Vienna Ab initio Simulation Package (VASP).<sup>2, 3</sup> Tkatchenko-Scheffler method<sup>4</sup> was used for van der Waals interactions correction. A 5 × 5 × 1 k-point mesh was used, with a 500 eV cutoff energy.

A four-layer FCC(111) model was used, with 3 × 3 unit cells consisting of 9 Cu atoms in each unit cell. The top two layers and the adsorbates were allowed to fully relax during relaxation calculations. A vacuum gap of approximately 15 Å was set along the surface normal direction. Nørskov's work<sup>5</sup> suggested that a charged water layer can significantly affect the intermediates' structures and energies. Therefore, extra water molecules and electric field were added during the calculations to better simulate the electrochemical environment. Based on Nørskov's calculations, the electric field was set to 0.9 V / Å along the z direction. To simulate the hydroxylation on copper surface, an extra OH was added on the surface, achieving an OH coverage  $\theta \approx 9.1\%$ . The free energy G was calculated as:

$$G = E + ZPE - TS$$

where E is the electronic energy, ZPE is the zero-point energy, T is the temperature, and S is the entropy.

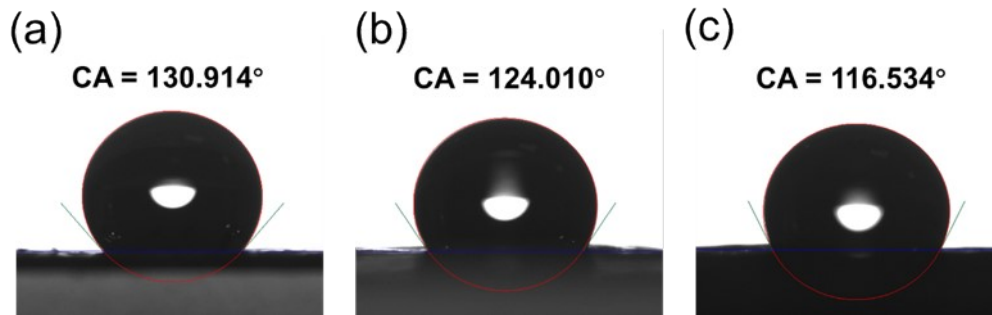

Fig. S1 Contact angel of (a) PTFE, (b) M\_Cu and (c) Cu/carbon paper.

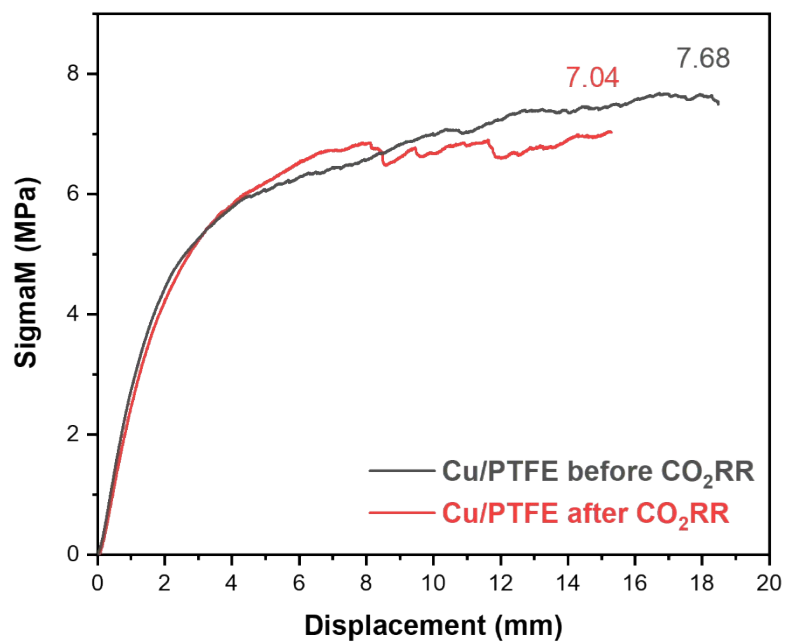

Fig. S2 Tensile strength measure of Cu/PTFE electrode before and after CO<sub>2</sub>RR.

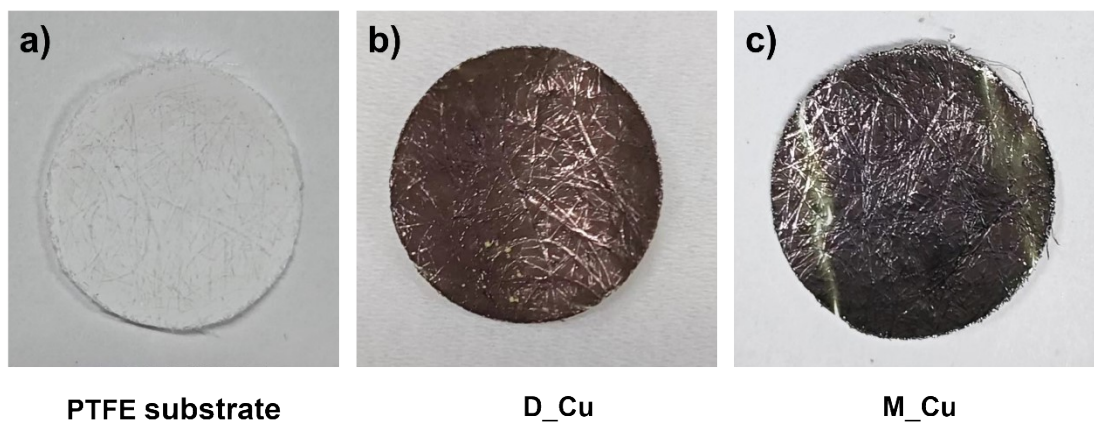

Fig. S3 Photograph of (a) PTFE substrate, (b) D\_Cu, (c) M\_Cu.

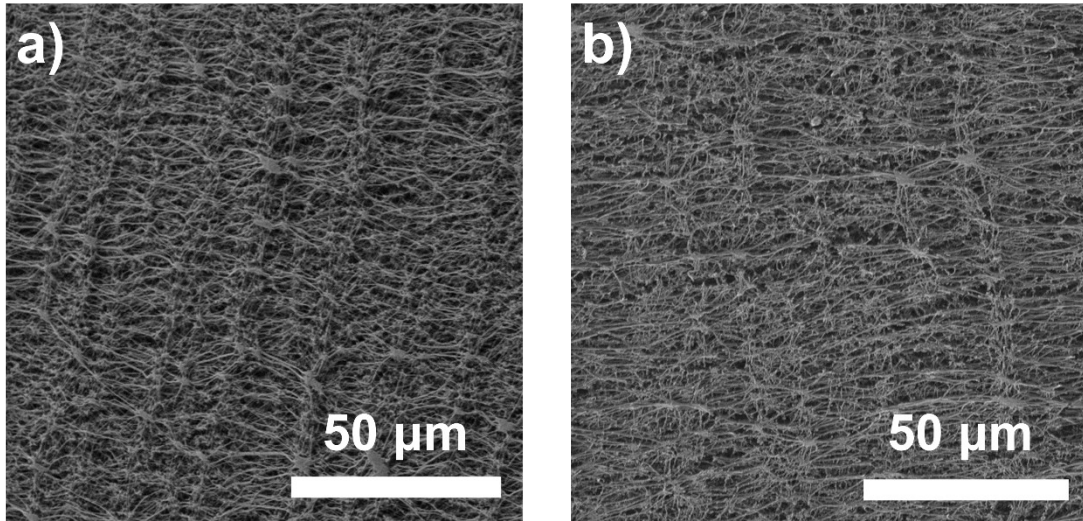

**Fig. S4** SEM images of (a) blank PTFE membrane, (b) Cu-sputtered PTFE.

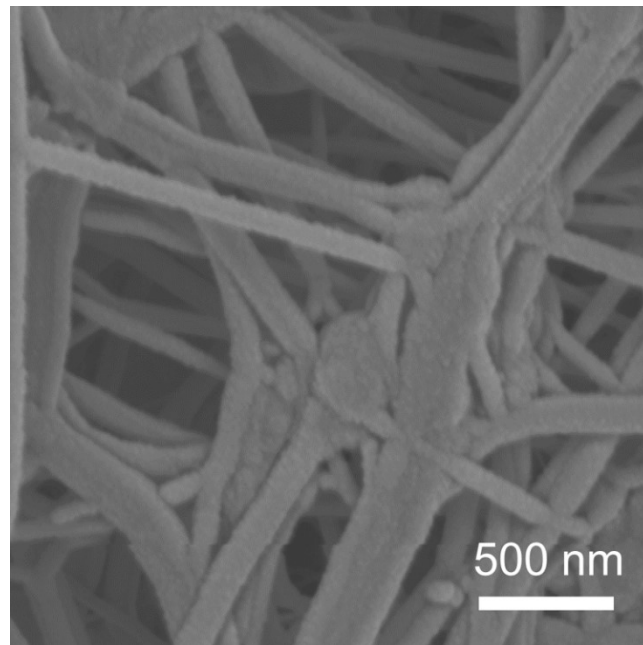

**Fig. S5** SEM image of D\_Cu.

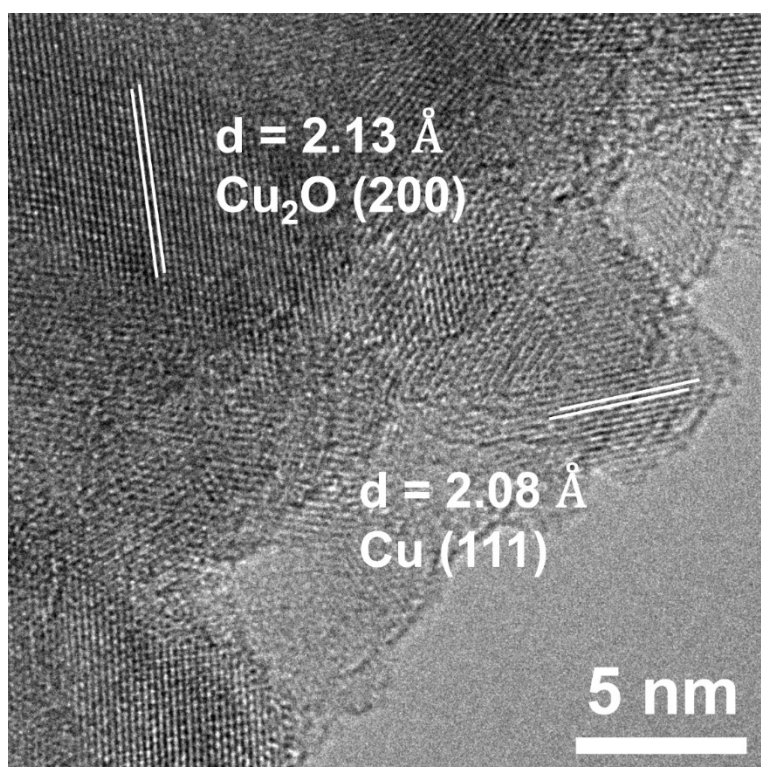

Fig. S6 TEM image of D\_Cu.

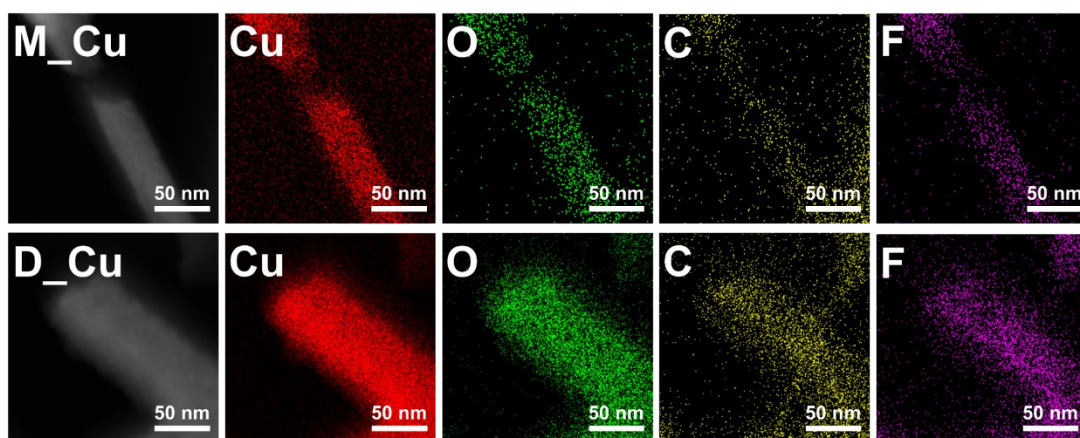

Fig. S7 TEM-EDS mapping of M\_Cu (above) and D\_Cu (below).

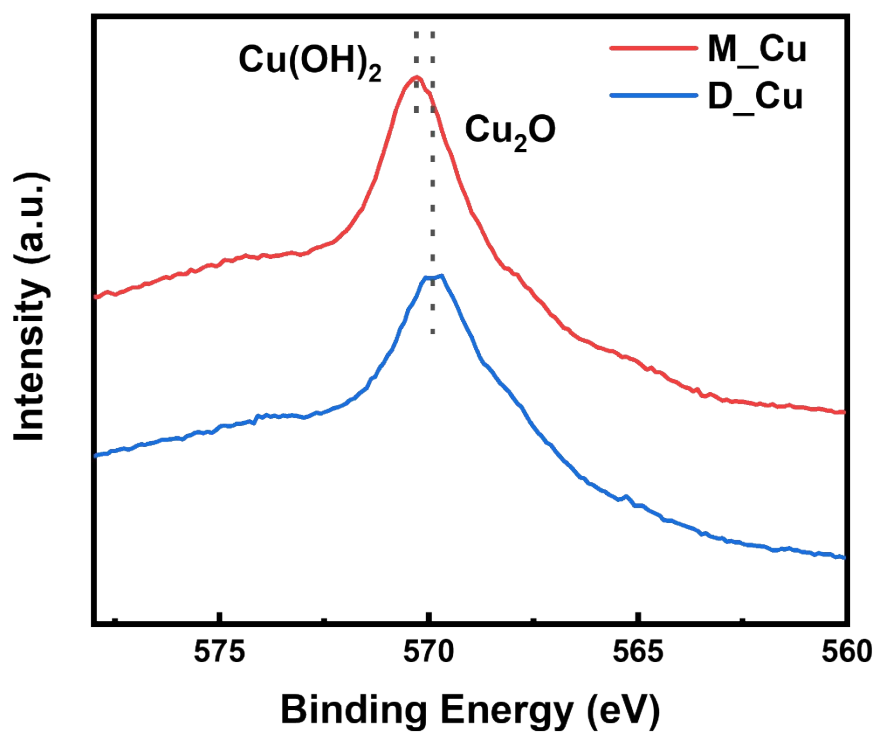

Fig. S8 Cu LMM of D\_Cu and M\_Cu.

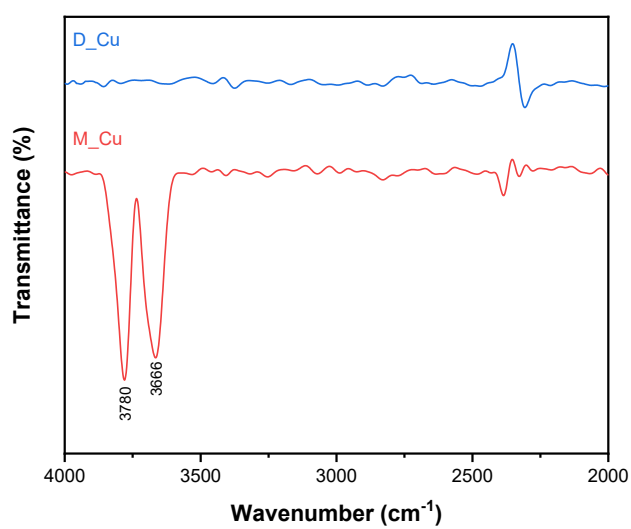

Fig. S9 Infrared spectra of M\_Cu and D\_Cu.

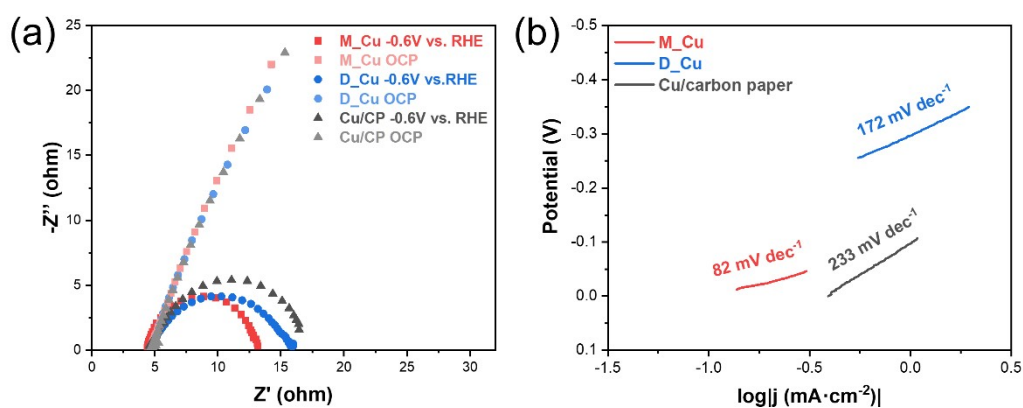

**Fig. S10** (a) EIS of M\_Cu, D\_Cu and Cu/carbon paper at OCP and -0.6 V vs. RHE. (b) Tafel plots of M\_Cu and D\_Cu and Cu/carbon paper.

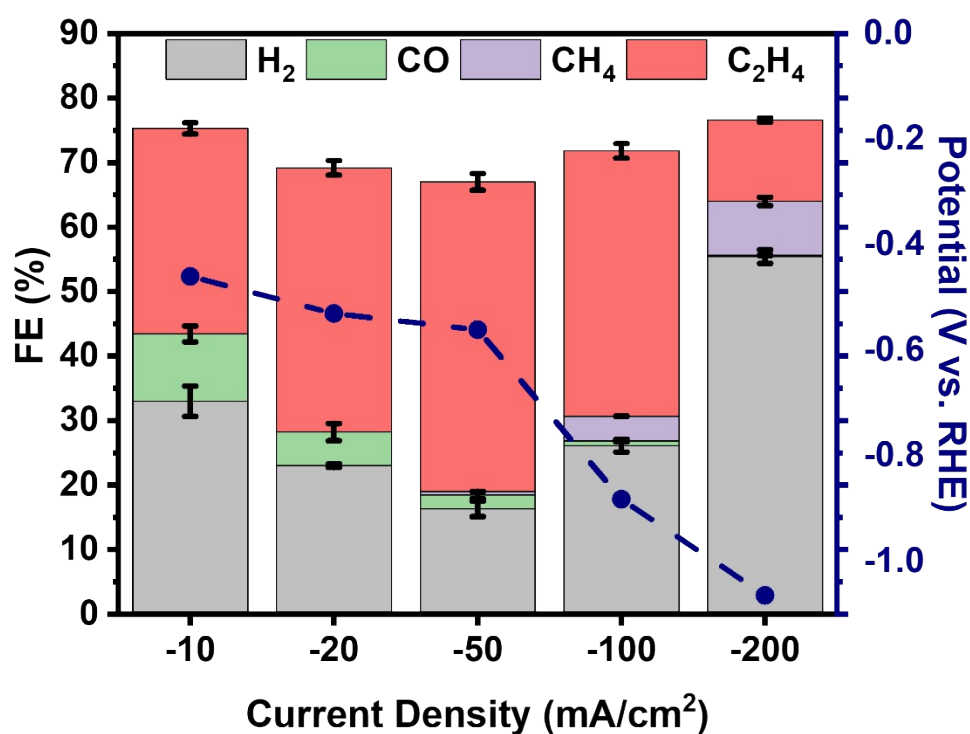

**Fig. S11** Faradaic efficiency for each CO<sub>2</sub>RR gaseous products of D\_Cu at various current densities and corresponding potentials.



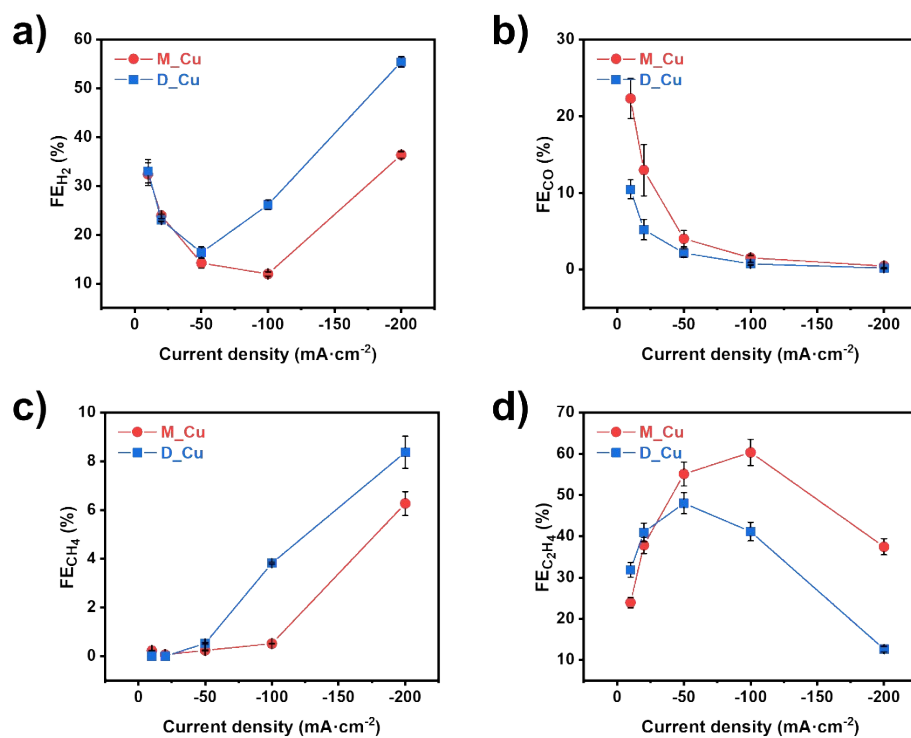

**Fig. S12** Current density plotted against the FE for (a)  $\text{H}_2$ ; (b)  $\text{CO}$ ; (c)  $\text{CH}_4$ ; (d)  $\text{C}_2\text{H}_4$ .

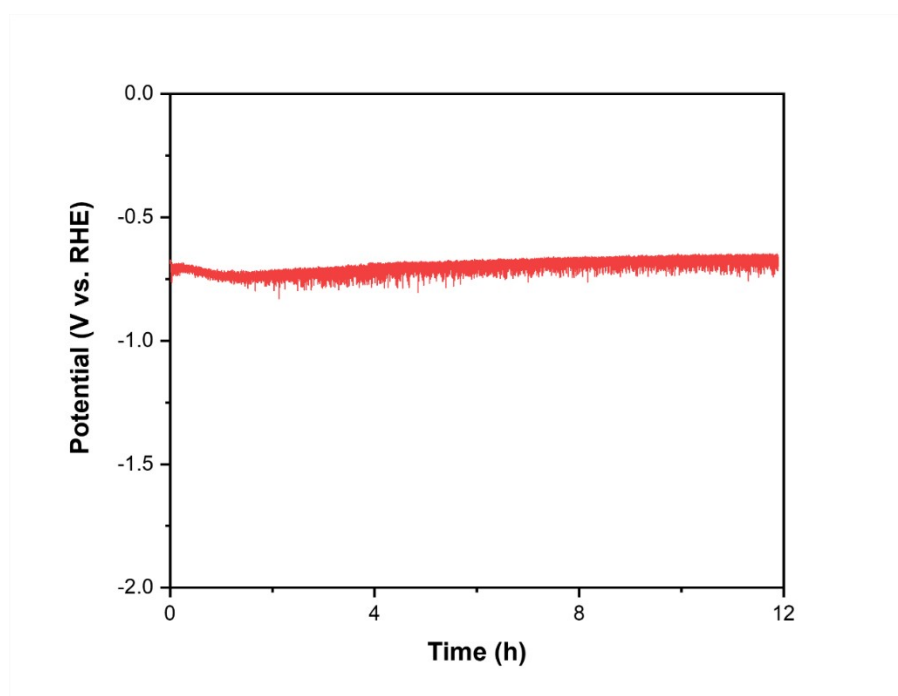

**Fig. S13**  $\text{CO}_2\text{RR}$  stability measurement of M\_Cu during 12h with an applied current density of  $-100 \text{ mA}\cdot\text{cm}^{-2}$

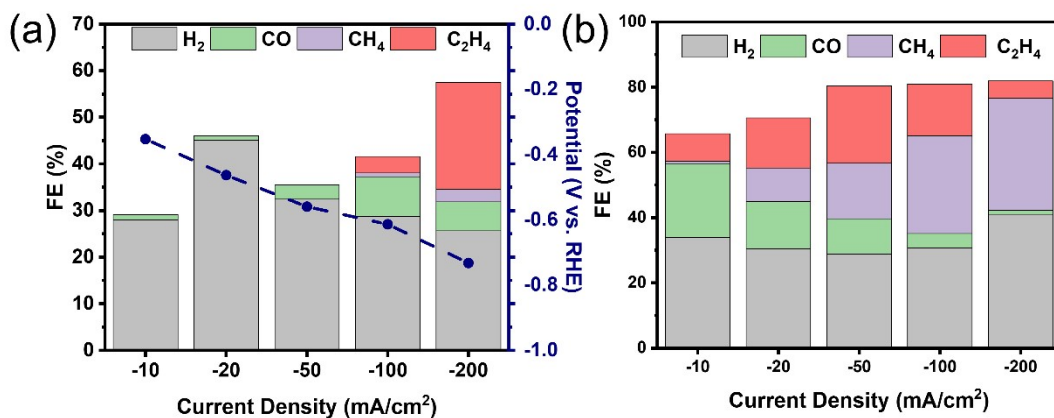

**Fig. S14** (a) Faradaic efficiency for each CO<sub>2</sub>RR gaseous products of commercial Cu nanoparticles (Cu NPs) at various current densities and corresponding potentials. (b) Faradaic efficiency for each CO<sub>2</sub>RR gaseous products of copper sputtered carbon paper at various current densities

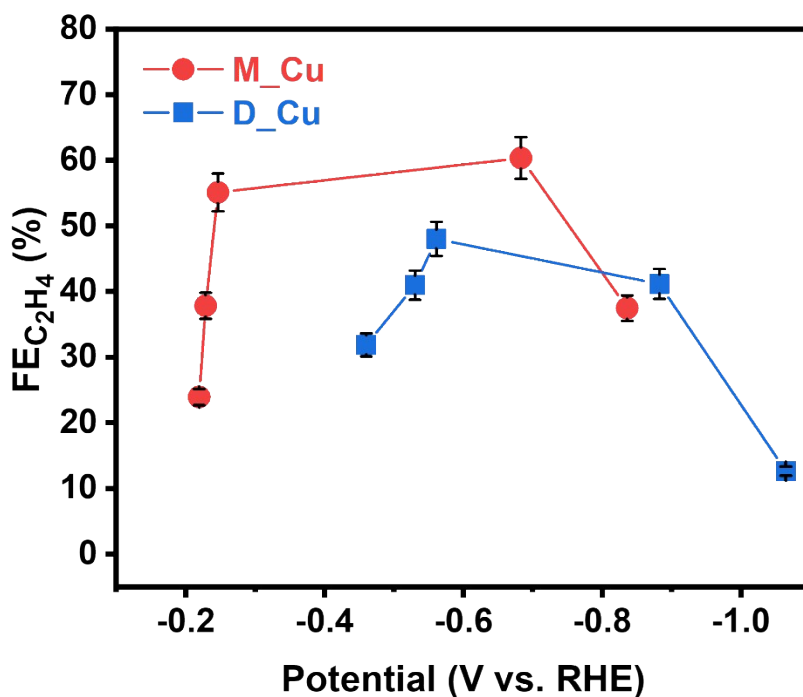

**Fig. S15** Faradaic efficiency for C<sub>2</sub>H<sub>4</sub> of M\_Cu and D\_Cu depending on the applied potentials.

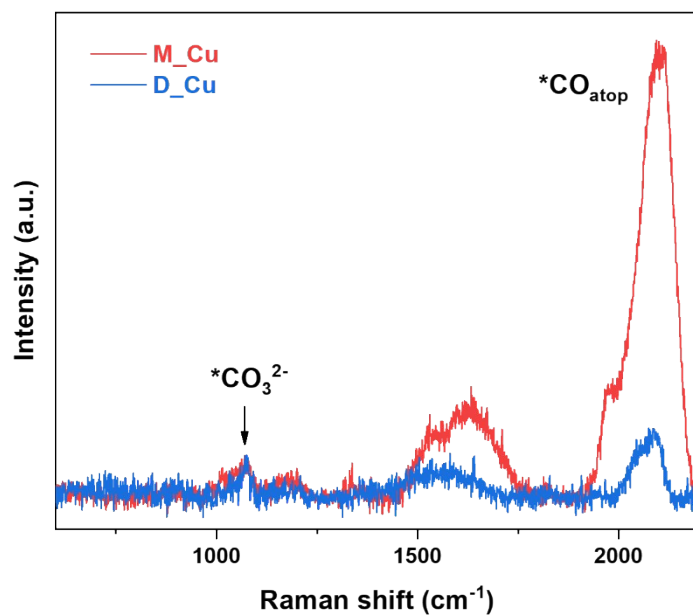

**Fig. S16** Raman spectrum of M\_Cu (0.2 V) and D\_Cu (-0.1 V), normalized by the intensity of the  $*\text{CO}_3^{2-}$  peak.

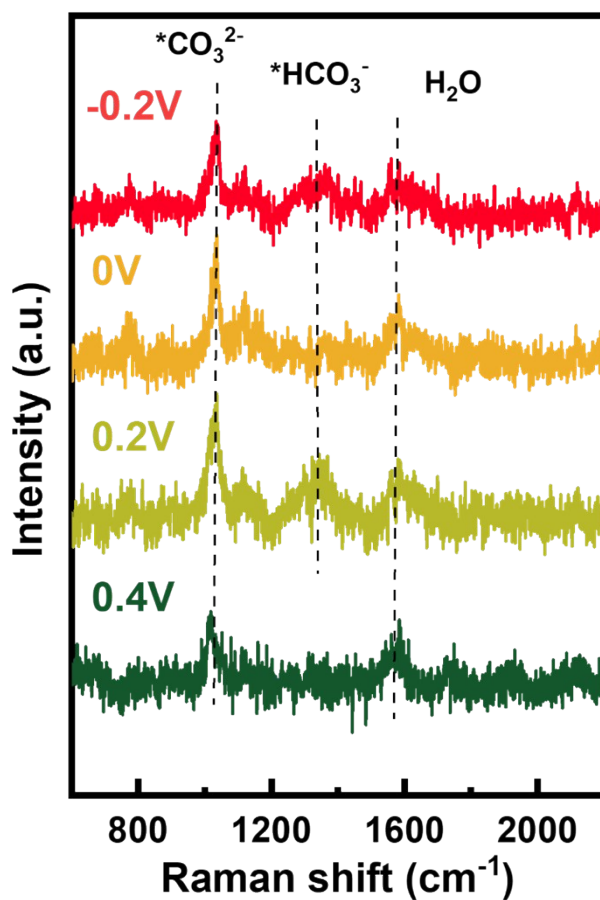

**Fig. S17** In situ Raman of bare Au electrode.

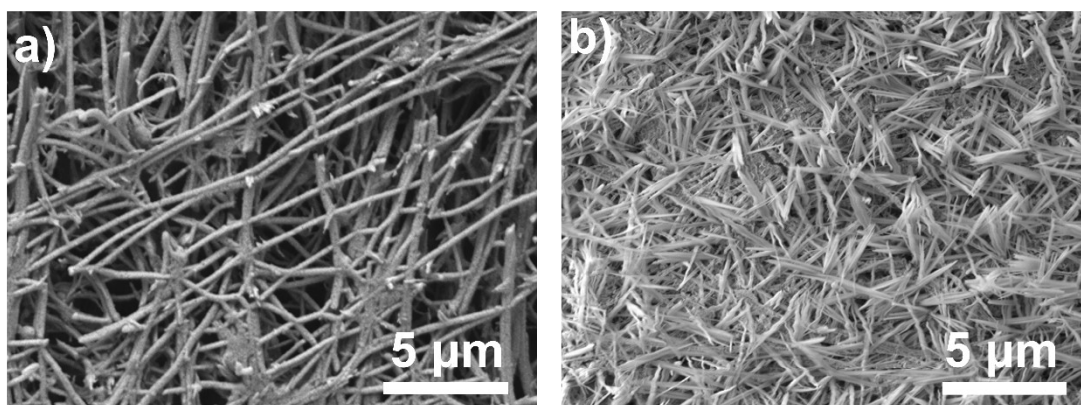

Fig. S18 SEM images of (a) post-reaction D\_Cu. (b) post-reaction M\_Cu.

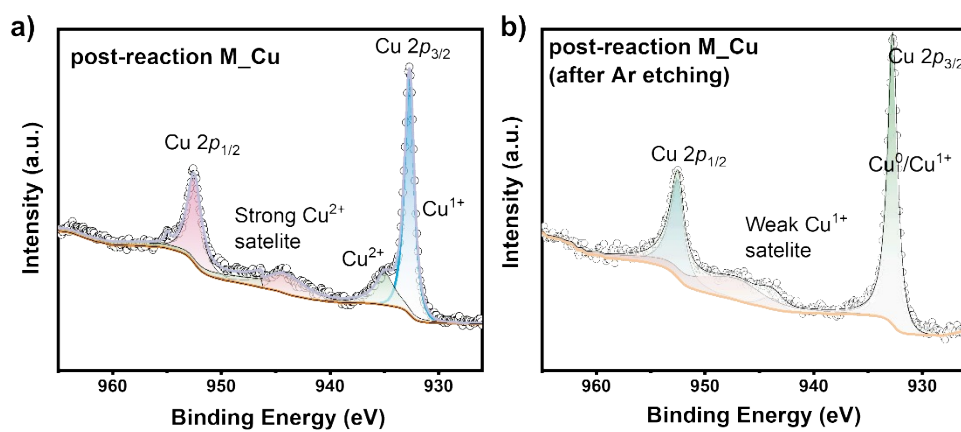

Fig. S19 XPS of (a) post-reaction M\_Cu. (b) post-reaction M\_Cu after Ar etching.

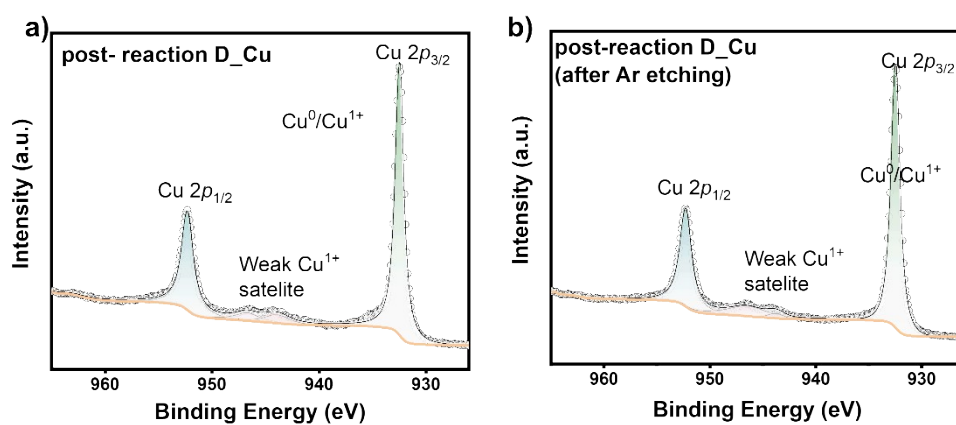

Fig. S20 XPS of (a) post-reaction D\_Cu. (b) post-reaction D\_Cu after Ar etching.

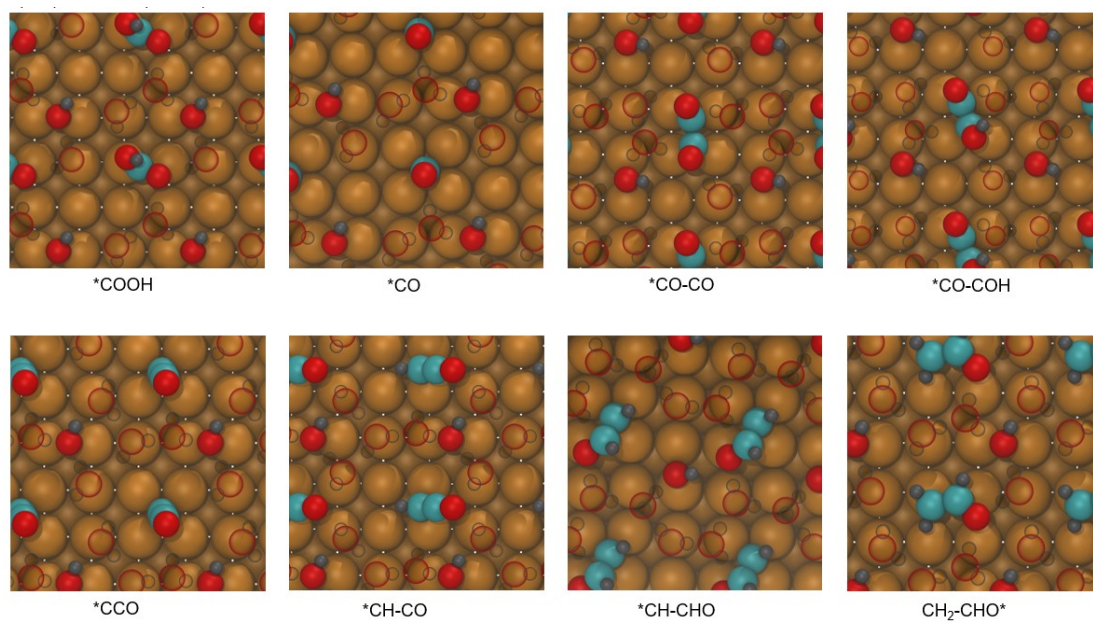

**Fig. S21** DFT optimized intermediates of CO<sub>2</sub>RR to C<sub>2</sub>H<sub>4</sub> on Cu(111) surface. Cu: dark golden; C: cyan; O: red; H: gray.

## references

- 1 J. P. Perdew, K. Burke and M. Ernzerhof, *Phys. Rev. Lett.*, 1996, **77**, 3865-3868.
- 2 G. Kresse and J. Furthmuller, *Comp. Mater. Sci.*, 1996, **6**, 15-50.
- 3 G. Kresse, *J Non-Cryst. Solids*, 1995, **193**, 222-229.
- 4 A. Tkatchenko and M. Scheffler, *Phys. Rev. Lett.*, 2009, **102**, 073005.
- 5 J. H. Montoya, C. Shi, K. Chan and J. K. Norskov, *J. Phys. Chem. Lett.*, 2015, **6**, 2032-2037.
